# Supplementary material for: Comparison of Physical and Biochemical Characterizations of SARS-CoV-2 Inactivated by Different Treatments
Source: MDPI journal article supplement (doi:10.3390/v14091938), 2022-08-31
Supplement: s1 [file s1]

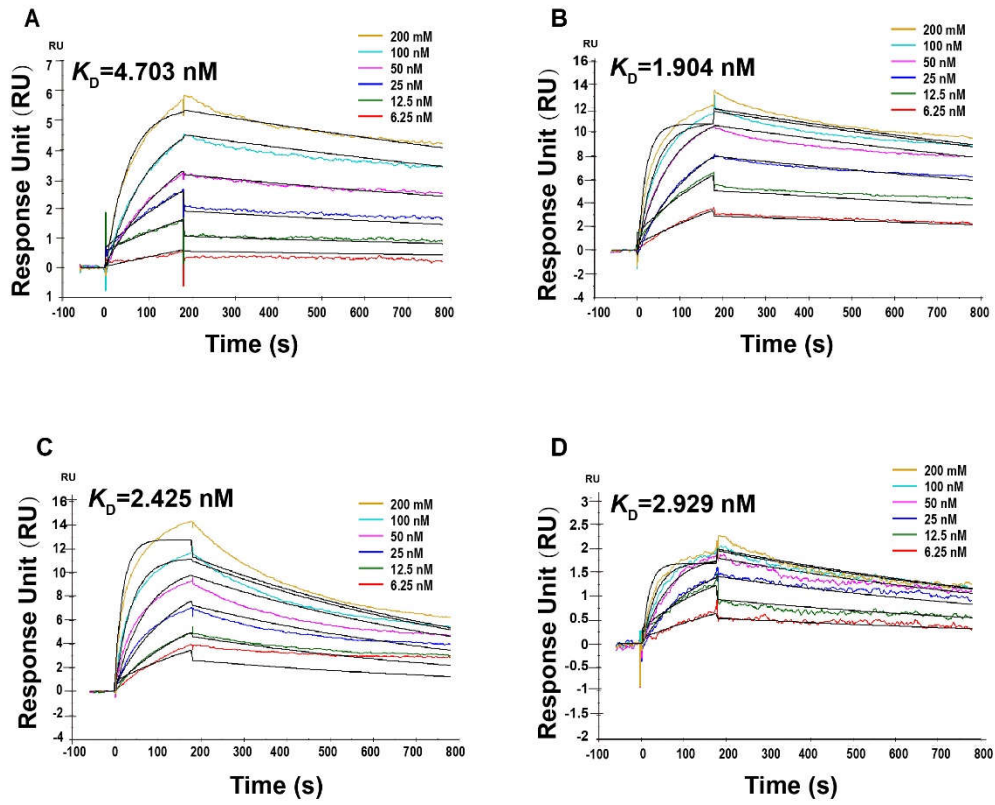

**Figure S1** SPR analysis of different inactivated virus samples to SARS-CoV-2 Spike chimeric monoclonal antibody D002. (A) Formaldehyde-inactivated virus samples. (B) Formaldehyde+BPL-inactivated virus samples. (3) BPL-inactivated virus samples. (4) BPL+BPL-inactivated virus samples.
